# Supplementary material
Source: MDPI journal article supplement (https://www.mdpi.com/2073-4433/13/9/1501)
Supplement: s1 [file s1 › atmosphere-1853628-supplementary.pdf]

# Supplementary Material: A holistic approach based on bio-monitoring techniques and satellite observations for air pollution assessment and health risk impact of atmospheric trace elements in a semirural area of Southern Italy (High Sauro Valley)

Rosa Caggiano <sup>1, \*</sup>, Antonio Speranza <sup>1</sup>, Vito Imbrenda<sup>1</sup>, Nicola Afflitto<sup>1</sup>, Serena Sabia<sup>1</sup>

<sup>1</sup> Institute of Methodologies for Environmental Analysis (IMAA), Italian National Research Council (CNR), Tito Scalo (PZ) 85050 Italy

**Correspondence:** rosa.caggiano@imaa.cnr.it

## Supplementary S1: Human health exposure assessment

The carcinogenic risk posed to the exposure of Cd, Cr(VI), Ni and Pb contained in the atmospheric aerosol particles through inhalation and the non-carcinogenic effect posed by Cd, Cr(VI) Cu, Mn, Ni, Pb and Zn through ingestion, dermal contact and inhalation pathways were evaluated using the model developed by the United States Environmental Protection Agency [49] The carcinogenic and non-carcinogenic health risk was assessed for both children and adults. The chemical daily intake (CDI), dermal absorbed dose (DAD), exposure concentration (EC) was estimated by the following equations [50]:

$$CDI_{ingest} = \frac{C \times IngR}{BW} \times \frac{EF \times ED}{AT} \times CF \quad (1)$$

$$DAD_{dermal} = \frac{C \times SA \times AF \times ABS}{BW} \times \frac{EF \times ED}{AT} \times CF \quad (2)$$

$$EC_{inh} = C \times \frac{ET \times EF \times ED}{ATn} \quad (3)$$

where: C is metal concentrations in the sampler (mg/Kg); IngR: ingestion rate (according to US EPA model, the default values for the ingestion exposure of soil/dust were 200 mg/day for children and 100 mg/day for adults); EF: exposure frequency (250 days year<sup>-1</sup>); ED: exposure duration (6 years for children and 24 years for adults); BW: the average body weight (15 kg for children and 70 kg for adults); AT: averaging time (for non-carcinogens, AT = ED

x365 days; for carcinogens,  $AT = 70 \times 365 = 25,550$  days); CF: conversion factor ( $10^{-6} \text{ kg mg}^{-1}$ ); SA: surface area of the skin that contacts the airborne particulates ( $3300 \text{ cm}^2$  for adults and  $2800 \text{ cm}^2$  for children); AF: skin adherence factor for the airborne particulates ( $0.2 \text{ mg/cm}^2$  for both adults and children); ABS: dermal absorption factor ( $0.001$ ) for Cd; no values were available for other elements; therefore, a conservative value of  $1.0\%$  was used in the present study (ICMM, 2007); ET: exposure time (hours/day); ATn: average time (for non-carcinogens,  $AT = ED \times 365 \text{ days} \times 24 \text{ hours/day}$ ; for carcinogens,  $ATn = 70 \text{ year} \times 365 \text{ days/year} \times 24 \text{ h}$ ). All parameters used in the calculation of CDI, DAD and EC were reported in US EPA, [51].

The possible carcinogenic effect of Cd, Cr (VI), Ni and Pb contained aerosol particles was considered by excess lifetime cancer risk (ELCR) and calculated according to the formula reported in the literatures [52] as follows:

$$ELCR = EC \times IUR \quad (4)$$

Where EC is the exposure concentration and IUR is the inhalation unit risk ( $\mu\text{g}/\text{m}^3$ )<sup>-1</sup>. The integrated excess lifetime cancer risk was also determinate as the sum of ELCR values ( $\Sigma\text{ELCR}$ ) for the considered carcinogenic elements. USEPA considers that if the ELCR values are less than  $1 \times 10^{-6}$ , (about 1 out of a 1,000,000 change) the risk arising from carcinogens could be negligible, for ELCR values between  $1 \times 10^{-6}$  and  $1 \times 10^{-4}$  some sort of remediation is desirable while for ELCR greater than  $1 \times 10^{-4}$ , it was indicated that the potential risk of cancer is posed seriously. [51,53]

The non-carcinogenic risk was evaluated by the hazard quotient (HQ) and hazard index (HI). HQ posed by Cd, Cr(VI), Cu, Mn, Ni, Pb and Zn contents atmospheric aerosol through ingestion ( $HQ_{\text{ing}}$ ), dermal contact ( $HQ_{\text{derm}}$ ) and inhalation ( $HQ_{\text{inh}}$ ) pathway were calculated as follows:

$$HQ_{\text{ing}} = \frac{CDI_{\text{ing}}}{RfDo} \quad (5)$$

$$HQ_{\text{derm}} = \frac{DAD_{\text{derm}}}{RfDo} \quad (6)$$

$$HQ_{\text{inh}} = \frac{EC_{\text{inh}}}{RfCi \times 1000 \mu\text{g}/\text{mg}} \quad (7)$$

$$HI = \sum HQ_i \quad (8)$$

where  $HQ_i$  is the hazard quotient of the  $i$ -th element,  $RfDo$  is the oral reference dose ( $\text{mg Kg}^{-1}\text{day}^{-1}$ );  $RfCi$  is the inhalation reference concentrations ( $\text{mgm}^{-3}$ ). Integrated HI correspond to the sum of the single  $HQ_i$  calculated for each element considered and was calculated as Eq. (8):

Values of HQ and/or HI greater than 1 indicate that non- carcinogenic effects may happened. The greater the HQ and/or HI value, the higher the probability of non- carcinogenic effects [51].

**Table S1** Experimental values (mean value±standard deviation) and certified values are referred to the International Atomic Energy Agency (IAEA) standard reference material, IAEA 336. Recovery percentage and method detection limit (MDL) results were also reported.

| Elements          | Experimental value<br>(mg kg <sup>-1</sup> ) | Certified values<br>(mg kg <sup>-1</sup> ) | Recovery<br>(%) | MDL<br>(ppm) |
|-------------------|----------------------------------------------|--------------------------------------------|-----------------|--------------|
| Al <sup>(a)</sup> | 482±71                                       | 680                                        | 71              | 0.04665      |
| Ca <sup>(a)</sup> | -                                            | not reported                               | -               | 0.20283      |
| Cd <sup>(b)</sup> | 0.155±0.12                                   | 0.117                                      | 133             | 0.00152      |
| Cr <sup>(a)</sup> | 1.265±0.20                                   | 1.060                                      | 119             | 0.00324      |
| Cu <sup>(b)</sup> | 4.952±1.16                                   | 3.600                                      | 138             | 0.00865      |
| Fe <sup>(a)</sup> | 361±6                                        | 430                                        | 84              | 0.13140      |
| K <sup>(a)</sup>  | 1734±41                                      | 1840                                       | 94              | 0.00867      |
| Li <sup>(a)</sup> | -                                            | not reported                               | -               | 0.00006      |
| Mg <sup>(a)</sup> | -                                            | not reported                               | -               | 0.00423      |
| Mn <sup>(a)</sup> | 48±2                                         | 63                                         | 76              | 0.06187      |
| Na <sup>(a)</sup> | 310±24                                       | 320                                        | 97              | 0.03230      |
| Ni <sup>(a)</sup> | -                                            | not reported                               | -               | 0.00354      |
| P <sup>(a)</sup>  | 522±27                                       | 610                                        | 86              | 0.00415      |
| S <sup>(a)</sup>  | -                                            | not reported                               | -               | 8.16875      |
| Pb <sup>(b)</sup> | 4.919±0.98                                   | 4.900                                      | 105             | 0.08070      |
| Ti <sup>(a)</sup> | -                                            | not reported                               | -               | 0.01488      |
| Zn <sup>(a)</sup> | 31±3                                         | 30.4                                       | 103             | 0.00282      |

<sup>a</sup> ICP-OES

<sup>b</sup> GF-AAS

**Table S2.** Spectral and spatial characterization of the Landsat 8 OLI-TIRS bands.

| Number of Band | Band Width<br>(μm) | Band Description                   | Spatial Resolution (m) |
|----------------|--------------------|------------------------------------|------------------------|
| 1              | 0.435–0.451        | Coastal aerosol                    | 30                     |
| 2              | 0.452–0.512        | Blue                               | 30                     |
| 3              | 0.533–0.590        | Green                              | 30                     |
| 4              | 0.636–0.673        | Red                                | 30                     |
| 5              | 0.851–0.879        | Near infrared (NIR)                | 30                     |
| 6              | 1.566–1.651        | Short wavelength infrared (SWIR) 1 | 30                     |
| 7              | 2.107–2.294        | SWIR 2                             | 30                     |
| 8              | 0.503–0.676        | Panchromatic                       | 15                     |
| 9              | 1.363–1.384        | Cirrus                             | 30                     |
| 10             | 10.60–11.19        | Thermal infrared sensor (TIRS)     | 100                    |
| 11             | 11.50–12.51        | TIRS 2                             | 100                    |

**Table S3.** Mean value  $\pm$  standard deviation ( $m \pm sd$ ), contamination Factor (CF) and Igeo indexes of the trace element concentrations measured in the lichen bags after 1-month exposure. The mean values of the trace element concentrations are highlighted in bold.

| Trace element concentrations | 1-month exposure                   | CF  |
|------------------------------|------------------------------------|-----|
| Al                           | <b>1480 <math>\pm</math> 493</b>   | 1.3 |
| Ca                           | <b>27186 <math>\pm</math> 7822</b> | 1.4 |
| Cd                           | <b>0.7 <math>\pm</math> 0.2</b>    | 1.4 |
| Cr                           | <b>2.1 <math>\pm</math> 0.7</b>    | 1.1 |
| Cu                           | <b>5 <math>\pm</math> 2</b>        | 1.3 |
| Fe                           | <b>1070 <math>\pm</math> 303</b>   | 1.1 |
| K                            | <b>6709 <math>\pm</math> 1038</b>  | 1.1 |
| Li                           | <b>2 <math>\pm</math> 0.1</b>      | 1.3 |
| Mg                           | <b>1741 <math>\pm</math> 274</b>   | 1.4 |
| Mn                           | <b>148 <math>\pm</math> 36</b>     | 1.1 |
| Na                           | <b>506 <math>\pm</math> 300</b>    | 1.9 |
| Ni                           | <b>4 <math>\pm</math> 1</b>        | 1.1 |
| P                            | <b>971 <math>\pm</math> 189</b>    | 1.2 |
| Pb                           | <b>18 <math>\pm</math> 8</b>       | 1.1 |
| S                            | <b>1943 <math>\pm</math> 238</b>   | 1.1 |
| Ti                           | <b>31 <math>\pm</math> 9</b>       | 1.2 |
| Zn                           | <b>83 <math>\pm</math> 17</b>      | 0.9 |

**Table S4.** Contamination factors (CF). pollution load indexes (PLI) calculated using lichen bags and NDVI' values for the 23 monitoring samples

| Monitoring samples | CF  |     |     |     |     |     |     |     |     |     |     |     |     |     |     |     |     | PLI | NDVI' |
|--------------------|-----|-----|-----|-----|-----|-----|-----|-----|-----|-----|-----|-----|-----|-----|-----|-----|-----|-----|-------|
|                    | Al  | Ca  | Cd  | Cr  | Cu  | Fe  | Li  | K   | Mg  | Mn  | Na  | Ni  | P   | Pb  | S   | Ti  | Zn  |     |       |
| <b>1</b>           | 0.8 | 1.0 | 1.2 | 1.1 | 1.1 | 0.9 | 1.0 | 1.0 | 1.0 | 0.9 | 1.2 | 0.9 | 1.1 | 1.5 | 1.1 | 0.9 | 1.1 | 1.1 | 0.003 |
| <b>2</b>           | 1.0 | 1.7 | 1.2 | 0.9 | 1.5 | 1.2 | 1.0 | 1.4 | 1.3 | 1.1 | 1.5 | 1.3 | 1.2 | 1.5 | 1.0 | 0.8 | 1.4 | 1.2 | 0.545 |
| <b>3</b>           | 0.9 | 0.9 | 0.9 | 0.9 | 1.0 | 1.0 | 1.2 | 1.2 | 1.2 | 1.2 | 1.1 | 0.7 | 1.2 | 0.8 | 1.1 | 1.2 | 0.9 | 1.0 | 0.228 |
| <b>4</b>           | 0.8 | 1.3 | 1.5 | 0.6 | 1.2 | 0.7 | 1.1 | 1.1 | 1.1 | 0.9 | 1.5 | 0.7 | 1.0 | 1.0 | 1.0 | 1.0 | 0.8 | 1.0 | 0.241 |
| <b>5</b>           | 1.4 | 1.9 | 1.3 | 0.9 | 0.9 | 0.9 | 1.2 | 1.2 | 1.3 | 1.0 | 1.8 | 1.1 | 1.0 | 0.6 | 0.9 | 1.4 | 0.7 | 1.1 | 1.120 |
| <b>6</b>           | 1.5 | 1.3 | 1.4 | 1.3 | 1.4 | 1.2 | 1.1 | 1.4 | 1.5 | 0.9 | 2.1 | 1.2 | 1.2 | 1.1 | 1.2 | 1.5 | 1.0 | 1.3 | 0.116 |
| <b>7</b>           | 1.0 | 0.8 | 0.9 | 0.9 | 1.0 | 1.0 | 1.1 | 1.3 | 1.5 | 0.9 | 2.3 | 0.8 | 1.6 | 0.7 | 1.0 | 1.0 | 0.8 | 1.1 | 2.144 |
| <b>8</b>           | 1.6 | 1.2 | 1.5 | 1.8 | 1.8 | 1.8 | 1.2 | 1.3 | 1.3 | 1.0 | 1.5 | 2.0 | 1.4 | 2.3 | 1.4 | 1.2 | 1.3 | 1.5 | 0.692 |
| <b>9</b>           | 1.8 | 1.6 | 1.5 | 1.6 | 1.3 | 1.5 | 1.2 | 1.4 | 1.7 | 1.3 | 1.7 | 1.4 | 1.1 | 1.2 | 1.2 | 1.5 | 1.1 | 1.4 | 1.333 |
| <b>10</b>          | 1.0 | 1.9 | 1.3 | 0.8 | 1.1 | 1.1 | 1.0 | 1.3 | 1.6 | 1.2 | 3.7 | 1.2 | 1.4 | 1.3 | 1.1 | 0.8 | 0.9 | 1.2 | 0.129 |
| <b>11</b>          | 1.4 | 2.1 | 1.6 | 1.4 | 1.1 | 1.4 | 1.2 | 1.2 | 1.5 | 1.2 | 1.8 | 1.4 | 1.1 | 1.1 | 1.0 | 1.5 | 0.9 | 1.3 | 1.194 |
| <b>12</b>          | 0.2 | 0.5 | 0.8 | 0.1 | 0.3 | 0.2 | 1.1 | 0.9 | 1.1 | 0.3 | 1.2 | 0.4 | 0.6 | 0.4 | 0.7 | 0.1 | 0.5 | 0.4 | 1.054 |
| <b>13</b>          | 1.2 | 1.3 | 1.8 | 1.2 | 1.5 | 1.1 | 1.2 | 1.2 | 1.5 | 0.9 | 2.6 | 1.1 | 1.1 | 1.3 | 1.1 | 1.3 | 1.0 | 1.3 | 1.056 |
| <b>14</b>          | 1.6 | 1.8 | 1.0 | 1.0 | 0.8 | 1.2 | 1.1 | 1.4 | 1.4 | 1.5 | 2.2 | 1.1 | 1.1 | 0.3 | 1.1 | 1.5 | 0.8 | 1.1 | 0.137 |
| <b>15</b>          | 1.4 | 1.2 | 1.3 | 1.3 | 1.3 | 1.4 | 1.1 | 1.5 | 1.6 | 1.2 | 2.5 | 1.1 | 1.4 | 0.9 | 1.1 | 1.2 | 0.9 | 1.3 | 0.333 |
| <b>16</b>          | 1.6 | 1.2 | 1.3 | 1.2 | 1.2 | 1.3 | 1.2 | 1.5 | 1.8 | 1.3 | 2.3 | 1.1 | 1.8 | 0.5 | 1.1 | 1.5 | 0.8 | 1.3 | 1.684 |
| <b>17</b>          | 1.2 | 1.1 | 1.6 | 1.2 | 1.1 | 1.1 | 1.2 | 1.3 | 1.6 | 0.9 | 1.6 | 1.0 | 1.0 | 1.2 | 1.1 | 1.4 | 0.9 | 1.2 | 0.112 |
| <b>18</b>          | 0.8 | 1.7 | 1.8 | 0.8 | 0.9 | 1.0 | 1.0 | 1.0 | 1.3 | 1.4 | 1.3 | 0.8 | 1.0 | 1.0 | 0.9 | 0.8 | 0.8 | 1.0 | 0.897 |
| <b>19</b>          | 2.2 | 1.3 | 1.6 | 1.5 | 1.2 | 1.7 | 1.1 | 1.5 | 1.4 | 1.2 | 1.2 | 1.2 | 1.2 | 1.0 | 1.1 | 1.5 | 0.8 | 1.3 | 0.534 |
| <b>20</b>          | 1.1 | 1.8 | 2.0 | 1.0 | 1.0 | 1.0 | 1.0 | 1.8 | 1.2 | 1.3 | 2.3 | 1.0 | 1.3 | 1.3 | 1.1 | 1.0 | 1.0 | 1.2 | 0.343 |
| <b>21</b>          | 1.3 | 1.6 | 1.2 | 0.9 | 3.7 | 1.1 | 1.3 | 1.6 | 1.7 | 1.6 | 1.7 | 1.0 | 1.4 | 0.8 | 1.1 | 1.4 | 0.9 | 1.3 | 0.536 |
| <b>22</b>          | 1.5 | 1.7 | 1.9 | 1.6 | 1.3 | 1.4 | 1.2 | 1.5 | 1.1 | 1.0 | 1.3 | 1.2 | 1.1 | 2.0 | 1.2 | 1.5 | 1.1 | 1.4 | 0.880 |
| <b>23</b>          | 1.2 | 1.1 | 1.0 | 1.6 | 1.0 | 1.2 | 1.1 | 1.3 | 1.4 | 0.9 | 2.3 | 0.8 | 1.2 | 0.9 | 1.0 | 1.1 | 0.8 | 1.1 | 1.648 |
